# Supplementary material for: Minimizing Adverse Effects of Cerenkov Radiation Induced Photodynamic Therapy With Transformable Photosensitizer-loaded Nanovesicles
Source: Research Square preprint supplement (doi:10.21203/rs.3.rs-1135369/v1), 2021-12-17
Supplement: Supplementary file 1 [file a2aee5d9c24aa84a0c949275.docx]

**Supporting**


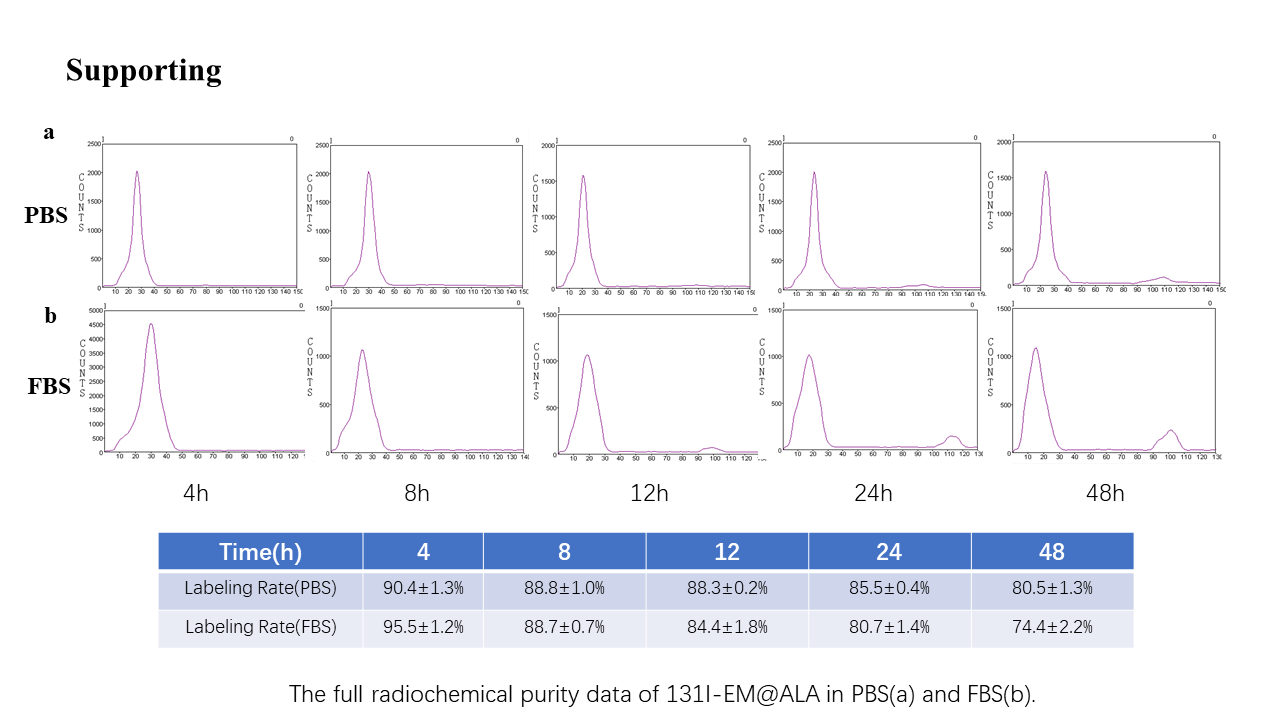


**Fig. s1** Full radiochemical purity data of 131I-EM@ALA in PBS (**a**) and FBS (**b**).


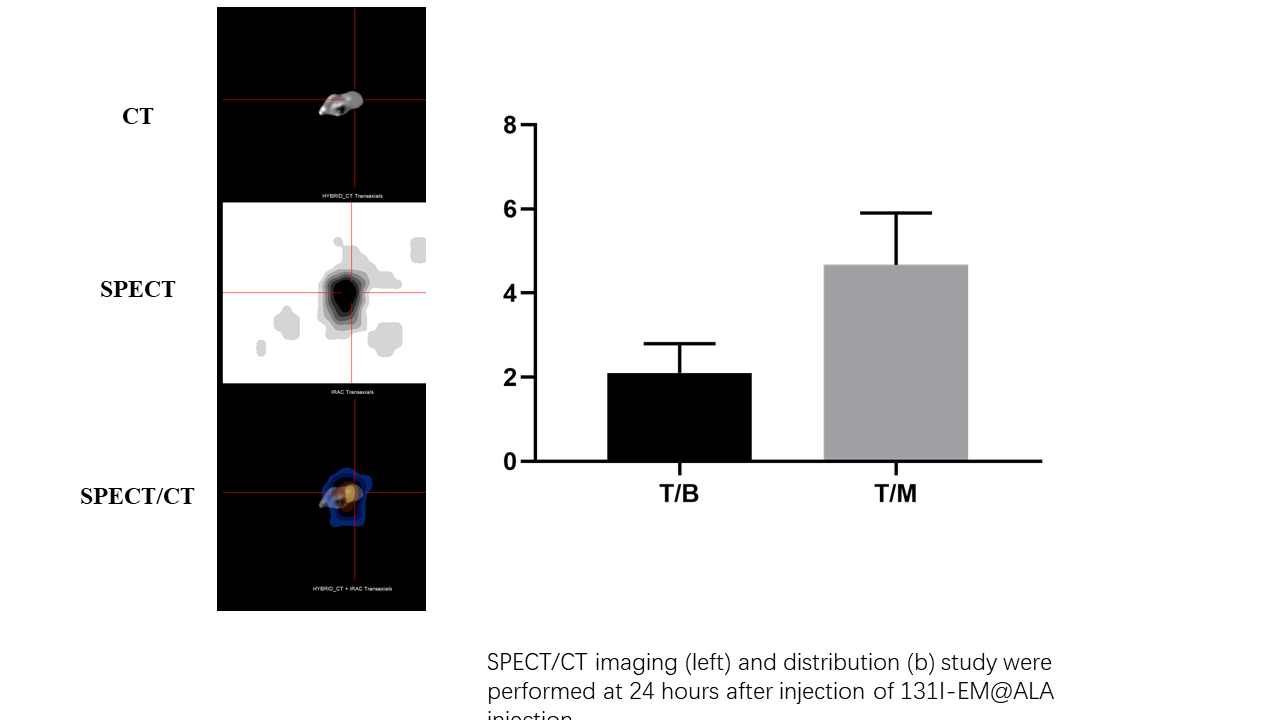


**Fig. s2** SPECT/CT imaging (**left**) and distribution (**right**) study were performed at 24 hours after injection of 131I-EM@ALA injection.


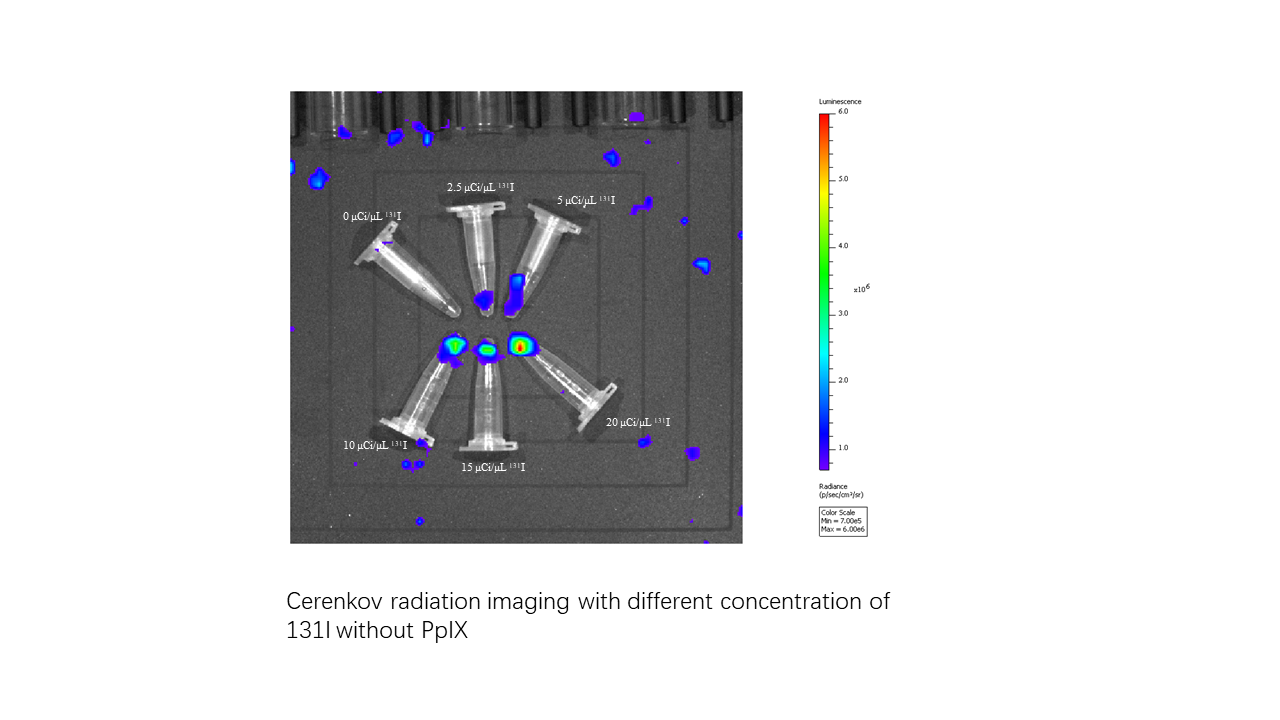


**Fig. s3** Cerenkov radiation imaging with different concentration of 131I without PpIX


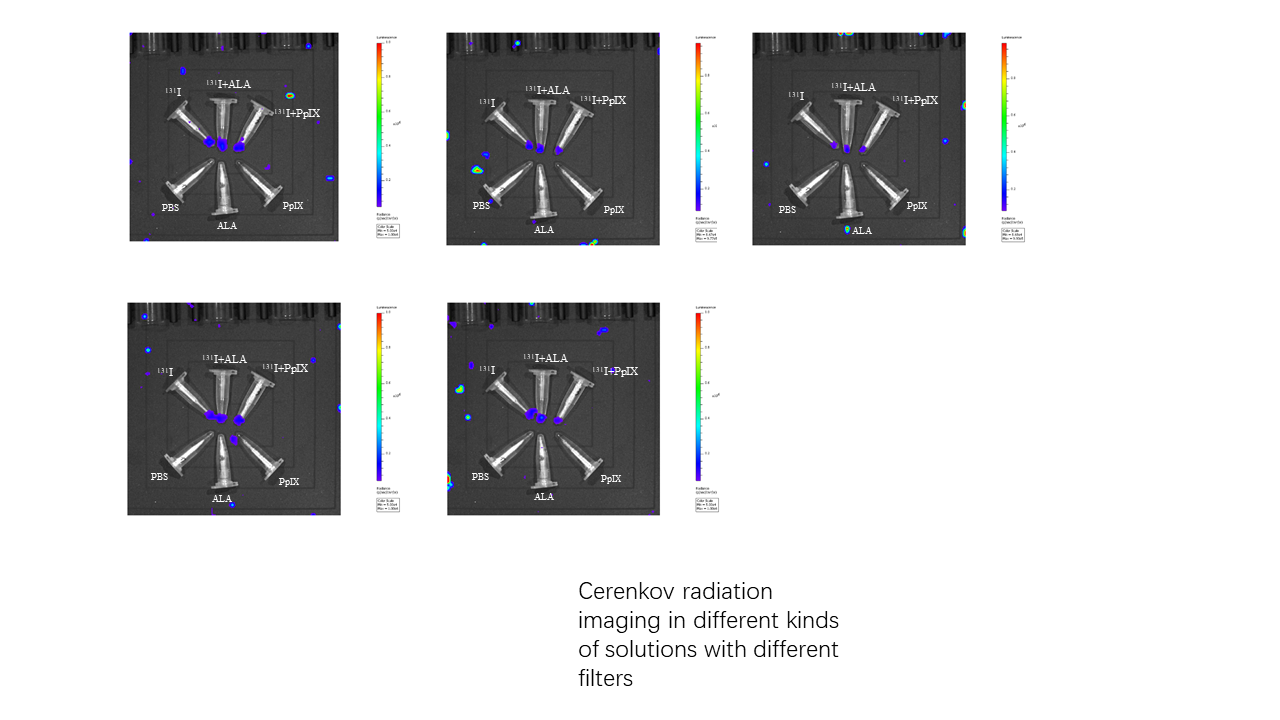


**Fig. s4** Cerenkov radiation imaging in different kinds of solutions with different filters
